# Supplementary material for: Sulfated Galactofucan from the Brown Alga Saccharina latissima—Variability of Yield, Structural Composition and Bioactivity
Source: PubMed Central journal article supplement (PMC4306926; doi:10.3390/md13010076), 2014-12-26
Supplement: marinedrugs-13-00076-s001.pdf [file marinedrugs-13-00076-s001.pdf]

## Supplementary Information

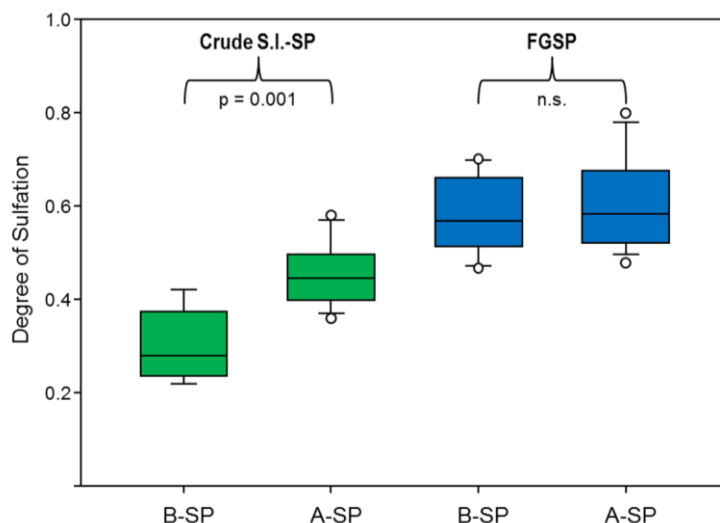

**Figure S1.** DS of Crude S.I.-SP and their FGSP Proportion in Relation to the Habitats Baltic Sea and Atlantic Ocean. The boxplots of B-SP represent the DS of the B05-SP and B06-SP batches; the boxplots of A-SP represent the DS of the A05-SP and A09-SP batches.

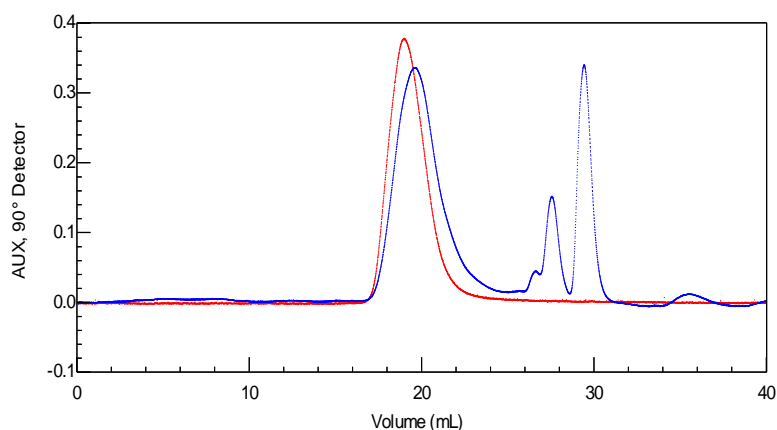

**Figure S2.** Size Exclusion Chromatogram of Fraction F3 of A09-SP (*i.e.*, Sulfated Galactofucan) (red line:  $M_r$  (MALLS); blue line:  $M_{HV}$  (RI)). A09-SP-F3 revealed a single peak with a mean  $M_r$  of  $416,000 \pm 28,000$  (MALLS) and  $449,000 \pm 15,000$  (RI), respectively. The further peaks at about 28 mL are due to solvent effects.

**Table S1.** Methylation Analysis Data of Native and Desulfated A09-SP-F3 <sup>a,b,c</sup>.

| Glycosyl Residue       | Position of<br><i>O</i> -Methyl Group | Deduced Position<br>of Substitution | A09-SP-F3<br>(native) | A09-SP-F3<br>(Desulfated) |
|------------------------|---------------------------------------|-------------------------------------|-----------------------|---------------------------|
| <b>Fucosyl</b>         | 2,3,4                                 | terminal                            | -                     | 42.6                      |
|                        | 2,3                                   | 4                                   | -                     | 1.2                       |
|                        | 2,4                                   | 3                                   | -                     | 33.4                      |
|                        | 3,4                                   | 2                                   | 23.8                  | 2.2                       |
|                        | 2                                     | 3,4                                 | 35.3                  | -                         |
|                        | 4                                     | 2,3                                 | 15.5                  | 3.8                       |
|                        |                                       |                                     | 2,3,4                 | 8.5                       |
| <b>Total Fucose</b>    |                                       |                                     | <u>83.1</u>           | <u>83.1</u>               |
| <b>Galactosyl</b>      | 2,3,4,6                               | terminal                            | -                     | 1.5                       |
|                        | 2,4,6                                 | 3                                   | 3.3                   | 3.7                       |
|                        | 2,3,6                                 | 4                                   | -                     | 3.7                       |
|                        | 2,3,4                                 | 6                                   | -                     | 5.3                       |
|                        | 2,6                                   | 3,4                                 | 2.5                   | -                         |
|                        | 2,4                                   | 3,6                                 | 8.5                   | -                         |
|                        | 2,3                                   | 4,6                                 | -                     | 2.3                       |
|                        | 2                                     | 3,4,6                               | 2.3                   | -                         |
| <b>Total Galactose</b> |                                       |                                     | <u>16.6</u>           | <u>16.6</u>               |
| <b>Xylosyl</b>         | 2,3,4                                 | terminal                            | <1                    | <1                        |
|                        | 2,3/3,4                               | 4/2                                 | <1                    | <1                        |

<sup>a</sup> The numbers indicate % (mol/mol) of partially methylated alditol acetates (PMAA); <sup>b</sup> Due to degradation and especially loss of fucose during desulfation, the fucose data of desulfated A09-SP-F3 have been upscaled to 83.1% and those for galactose and xylose accordingly downscaled for simpler interpretation. However, the methylation data on desulfated A09-SP-F3 have to be treated with caution; <sup>c</sup> All monosaccharides showed to be present in pyranose form.
